# Supplementary material for: Cellular production of a counterfeit viral protein confers immunity to infection by a related virus
Source: PubMed Central journal article supplement (PMC6166632; doi:10.7717/peerj.5679), 2018-09-28

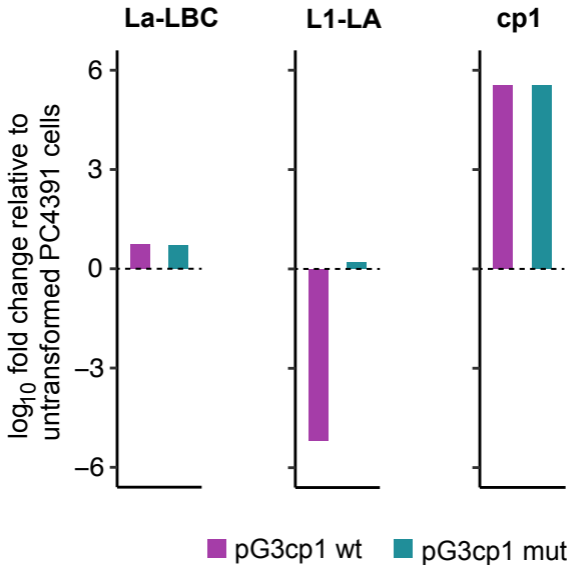

Supplement: peerj-06-5679-s001.pdf [file peerj-06-5679-s001.pdf]
