# Supplementary material for: Cellular production of a counterfeit viral protein confers immunity to infection by a related virus
Source: PubMed Central journal article supplement (PMC6166632; doi:10.7717/peerj.5679), 2018-09-28
Supplement: peerj-06-5679-s002.pdf [file peerj-06-5679-s002.pdf]

# Tryptic peptides detected by GeLC-MS/MS (bold face in sequence)

## ScVl1cap

1 MLRFVTKNSQ DKSSDLFSIC SDR**GTFVAHN RVRTDFKFDN LVFNRVYGV**S  
51 QKF~~TLVGNPT~~ VCFNEGSSYL EGI**AKKYLTL DGGLAIDNVL NELRSTCGIP**  
101 GNAVASHAYN ITS**WRWYDNH VALLMNMLRA YHLQVLTEQG QYSAGDIPMY**  
151 **HDGHVKIKLP VTIDDTAGPT QFAWPSDRST** DSYPDWAQFS ESFPSIDV**PY**  
201 LDVRPLTVTE VNFVLMMSK WH**RRTNLAID YEAPQLADKF AYRHALTVQD**  
251 **ADEWIEGDRT DDQFRPPSSK VMLSALRKYV** NRNRLYNQFY TAAQLLAQIM  
301 MKPVPNCAEG YAWLMDALV NIPKFGSIRG RYPFLLSGDA ALIQATALED  
351 WSAIMAKPEL VFTYAMQVSV ALNTGLYLRR VKKTGF**GTTI DDSYEDGAF**L  
401 QPETF**VQAAL ACCTGQDAPL** NGMSDVVYTY PDLLEF**DAVT QVPITVIEPA**  
451 GYNIVDDHLV VVGVPVACSP YMIFPVA**AFD TANPYCGNFV IKAANKYL**RK  
501 **GAVYDKLEAW KLA**WALRVAG YDTHFKVHGD THGLTKFYAD**** NSDTWTHIPE  
551 FVTGDGDM**EV FVTAIERRAR HFVELPRLNS PAFFRSVEVS TTIYDTHVQA**  
601 **GAHSVYHARR INLDYVKPVS TGIQVINAGE** LKNYWGSVRR **TQOGLGVVGL**  
651 TMPAVMPTGE PTAGAAHEEL IEQADNVLVE

Previous mass spec of ScVl1 was also missing internal tryptic peptides between 250 and 500. The situation is similar for DhVcpl (see below).

## DhVcplhis tagged

1 MLKFVNELNS KRKNCLYHSQ QVDGTVRAMS RIRVDFKYNG LKFS**RTLTAS**  
51 **QDYTWGKAL** VCMSEAASSL DGLNKK**YLTL DGAISTENVF QELKNLAGLQ**  
101 SNIIAEHTHN VAGWR**WYDNH VALLVNLLRF YILSDLDERS** KLSTGKFPVY  
151 DDGHIIDLN DTLLEDKAV DWTWPGRRVD ESYPYWNPMT EFLPVTDDPH  
201 IDLRPLTEEE AKVVLMMTGE WKPQTNYKLD FYTPRLAEKI MYR**YRNPIS**S  
251 **LNEWLDAEGT APTYL**PKSR**** VIWSALRKYV THNNLYNQFY TATNIVAQVM  
301 LTVYPD**TAE**G MTWLTHVPEV HLPKFGSVRG RYPFLNSGEA AF**IQAKALE**D  
351 WAALIAKPEL LFTYGMMLAS TLNIGLAVRD AKASLLIGED KSSFDDTLFL  
401 TPETFFASAV SLATGLDAPL NGMGDVYVY PELVNIN**ETW EVPAVILEPN**  
451 GYLIKDNHIL STGIPFVGSP YLVYSLAVFD EANPYSGNFV LPEPLR**RTRK**  
501 GAIYSFVDAW KMGWAARIAG YDLSINVFSS NVNYTKYFSP N**NSWSHVLT**  
551 NGIDDKVEGV LIKDM**TRRSR HFVDLPNFFV PGNH**PVTEVK VNVLGTSVLD****  
601 **AAGKNRAAG** TAN**EWTPSS** LGLQIVSKED VRRFWGHIK**R HKSGLAMEGL**  
651 TMSVNVPAIE GNRGVEVMKG ELRG**H**PFEGK PIPNPLLGLD STRTGH****HHHH  
701 H
